# Supplementary material
Source: ML conference proceedings conference paper supplement (https://proceedings.mlr.press/v89/zhe19a.html)
Supplement: Supplementary file [file zhe19a-supp.pdf]

## Supplementary Materials

We supplement the proof of *Lemma 4.1* in Section 4 of the main paper.

**Lemma 4.1.** *If we can arrange  $d$  outputs into a  $Q$ -mode tensor with an equal dimension in each mode, and  $Qd^{\frac{1}{Q}} \leq N$ , the time complexity of HOGPR is  $\mathcal{O}(N^2d)$  — linear to the number of outputs. Such  $Q$  always exists when  $d \leq e^{\frac{N}{e}}$ .*

*Proof.* First, since  $d_1 = \dots = d_Q$  and  $d = \prod_{k=1}^Q d_k$ , we have each  $d_k = d^{\frac{1}{Q}}$ . Then we have  $\sum_{k=1}^Q d_k = Qd^{\frac{1}{Q}} \leq N$  and  $Nd(\sum_{k=1}^Q d_k + N) \leq 2N^2d$ . Therefore, the time complexity is  $\mathcal{O}(N^2d)$ . Second, if we allow continuous  $Q$ , and take the gradient of the function,  $f(Q) = Qd^{\frac{1}{Q}}$ , we have

$$\frac{\nabla f(Q)}{\nabla Q} = d^{\frac{1}{Q}} \left(1 - \frac{\log(d)}{Q}\right).$$

When  $Q \leq \log(d)$ , the gradient will be non-positive, and the function is monotonically decreasing. The function reaches the minimum at  $Q = \log(d)$ , and the minimum value is  $e \cdot \log d$ . Hence as long as  $N \geq e \cdot \log d$  — equivalently,  $d \leq e^{\frac{N}{e}}$ , there must exist  $Q$  such that  $f(Q) \leq N$ , namely,  $Qd^{\frac{1}{Q}} \leq N$ .  $\square$
